# Supplementary material for: Niche Variation in Endemic Lilium pomponium on a Wide Altitudinal Gradient in the Maritime Alps
Source: MDPI journal article supplement (doi:10.3390/plants11060833), 2022-03-21
Supplement: s1 [file s1]

## **Supplementary material**

**Table S1.** Spatial coordinates and altitude of the 25 meteorological stations used to define bioclimatic zones for stratified sampling (minimal and maximal altitudes for each cluster are highlighted in bold type).

| Bioclimatic cluster | Station ID | Longitude | Latitude | Altitude (m.a.s.l.) | Bioclimatic characteristics *                                                                                               |
|---------------------|------------|-----------|----------|---------------------|-----------------------------------------------------------------------------------------------------------------------------|
| 1                   | 6005001    | 7.01      | 43.92    | 1173                | High values for bio2, 3, 14, 17, 18: important precipitation even during summer, strong daily and annual thermic variations |
|                     | 6077006    | 7.363     | 43.929   | 1443                |                                                                                                                             |
|                     | 6094002    | 6.931     | 44.1     | 1784                |                                                                                                                             |
|                     | 6102001    | 7.13      | 44.07    | 1130                |                                                                                                                             |
|                     | 6125001    | 6.75      | 44.15    | 1642                |                                                                                                                             |
| 2                   | 6037002    | 6.92      | 43.75    | 1268                | High values for bio12, 13, 16 : important precipitations in general                                                         |
|                     | 6050002    | 7.05      | 43.79    | 985                 |                                                                                                                             |
|                     | 6081001    | 6.809     | 43.814   | 1525                |                                                                                                                             |
|                     | 83044003   | 6.471     | 43.659   | 892                 |                                                                                                                             |
| 3                   | 4115001    | 6.62      | 44.03    | 1090                | Intermediate values for bioclimatic variables, but a bit more precipitation during the warmest quarter for cluster 3        |
|                     | 4136001    | 6.52      | 43.98    | 920                 |                                                                                                                             |
|                     | 6074005    | 7.31      | 43.97    | 550                 |                                                                                                                             |
|                     | 6099004    | 6.89      | 43.96    | 442                 |                                                                                                                             |
|                     | 6127006    | 7.26      | 44.07    | 899                 |                                                                                                                             |
|                     | 6163007    | 7.59      | 44.04    | 636                 |                                                                                                                             |
| 4                   | 6038001    | 6.99      | 43.67    | 388                 | High values for bio1, 5, 6, 8, 10, 11 : high temperatures in general                                                        |
|                     | 6059003    | 7.36      | 43.74    | 677                 |                                                                                                                             |
|                     | 6075007    | 7.21      | 43.85    | 691                 |                                                                                                                             |
|                     | 6091003    | 7.43      | 43.78    | 1106                |                                                                                                                             |
|                     | 6118002    | 6.809     | 43.679   | 694                 |                                                                                                                             |
|                     | 6136005    | 7.434     | 43.863   | 843                 |                                                                                                                             |
| 5                   | 6033002    | 7.21      | 43.79    | 78                  | High values for bio1, 5, 6, 8, 10, 11 : high temperatures in general                                                        |
|                     | 6083005    | 7.49      | 43.79    | 216                 |                                                                                                                             |
|                     | 6088001    | 7.21      | 43.65    | 26                  |                                                                                                                             |
|                     | 6088007    | 7.28      | 43.74    | 238                 |                                                                                                                             |

\* See also PCA graph (Figure SF1)

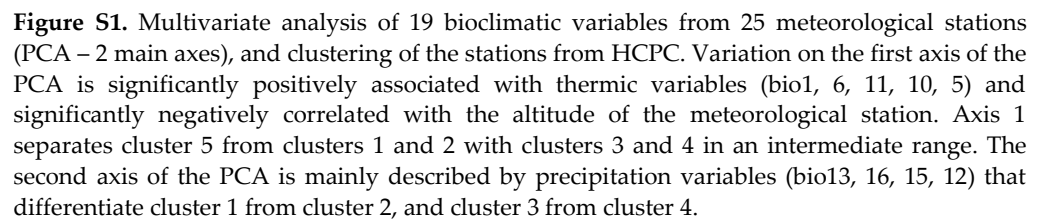

**Figure S1.** Multivariate analysis of 19 bioclimatic variables from 25 meteorological stations (PCA – 2 main axes), and clustering of the stations from HCPC. Variation on the first axis of the PCA is significantly positively associated with thermic variables (bio1, 6, 11, 10, 5) and significantly negatively correlated with the altitude of the meteorological station. Axis 1 separates cluster 5 from clusters 1 and 2 with clusters 3 and 4 in an intermediate range. The second axis of the PCA is mainly described by precipitation variables (bio13, 16, 15, 12) that differentiate cluster 1 from cluster 2, and cluster 3 from cluster 4.

**Table S2.** Studied gradients and micro-niche characteristics, structured in groups of variables. Variables in italics were not included in analyses because of redundancy. For biotic micro-niche, contacted plant species and their abundances were combined in four variables, corresponding to the main axes of a Principal Coordinates Analysis (PCoA).

| Group of characteristics                     |                         | Variable                                                   | Code name         |
|----------------------------------------------|-------------------------|------------------------------------------------------------|-------------------|
| Ecological gradients and distribution limits |                         | Altitude                                                   | Altitude          |
|                                              |                         | Climatic gradient                                          | Clim_grad         |
|                                              |                         | Distance to the centre of <i>L. pomponium</i> distribution | Dist_centre       |
|                                              |                         | Distance to the limits of <i>L. pomponium</i> distribution | Dist_limit        |
|                                              |                         | <i>Ratio of those distances</i>                            | <i>Dist_ratio</i> |
| Micro-niche                                  | Topographic micro-niche | Slope                                                      | Slope             |
|                                              |                         | <i>Aspect</i>                                              | <i>aspect</i>     |
|                                              |                         | Easting (sin(aspect))                                      | easting           |
|                                              |                         | Northing (cos(aspect))                                     | northing          |
|                                              | Soil cover              | Lichen cover                                               | Lich_cov          |
|                                              |                         | Moss cover                                                 | Moss_cov          |
|                                              |                         | Litter cover                                               | Litt_cov          |
|                                              |                         | Gravel and bare soil cover                                 | GravBSoil         |
|                                              |                         | Block cover                                                | Block_cov         |
|                                              |                         | Stone cover                                                | Stone_cov         |
|                                              |                         | Bedrock cover                                              | BedRock_cov       |
|                                              | Edaphic micro-niche     | Water retention capacity                                   | WRC               |
|                                              |                         | <i>Water retention potential</i>                           | <i>WRP</i>        |
|                                              |                         | pH                                                         | pH                |
|                                              |                         | Conductivity                                               | conduc            |
|                                              |                         | <i>Organic matter content</i>                              | <i>OM</i>         |
|                                              |                         | Percentage of Carbon                                       | pC                |
|                                              |                         | <i>Percentage of Nitrogen</i>                              | <i>pN</i>         |
|                                              |                         | <i>C:N ratio</i>                                           | <i>C/N</i>        |
|                                              | Biotic micro-niche      | Number of species                                          | nb_sp             |
|                                              |                         | Shannon diversity                                          | Shannon_div       |
|                                              |                         | Vegetation cover                                           | Vegetation_cov    |
|                                              |                         | 1st axis of the PCoA                                       | PCoA-axe1         |
|                                              |                         | 2 <sup>nd</sup> axis of the PCoA                           | PCoA-axe2         |
|                                              |                         | 3rd axis of the PCoA                                       | PCoA-axe3         |
|                                              |                         | 4th axis of the PCoA                                       | PCoA-axe4         |

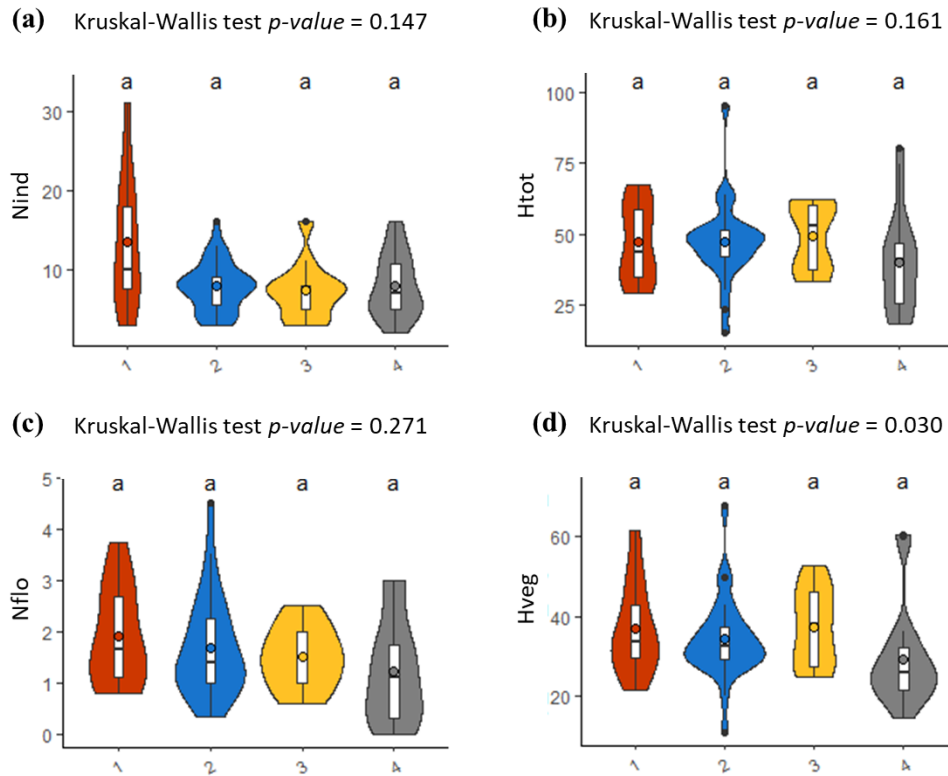

**Figure S2.** Local abundance and mean phenotype for each quadrat depending on its micro-niche type. Local abundance corresponds to the number of plants in the quadrat (Nind – a), and mean phenotypes are calculated from measurements of four individuals randomly selected in each quadrat. Total height (Htot – b), vegetative height (Hveg – d) and number of flowers (Nflo – c) were measured on the field. Kernel density for each micro-niche type shows quartiles (boxplot) and mean values (coloured circle). Code letters indicate that micro-niche means are significantly ( $p < 0.05$ ) different in pair-wise Wilcoxon tests with Bonferroni adjustment.

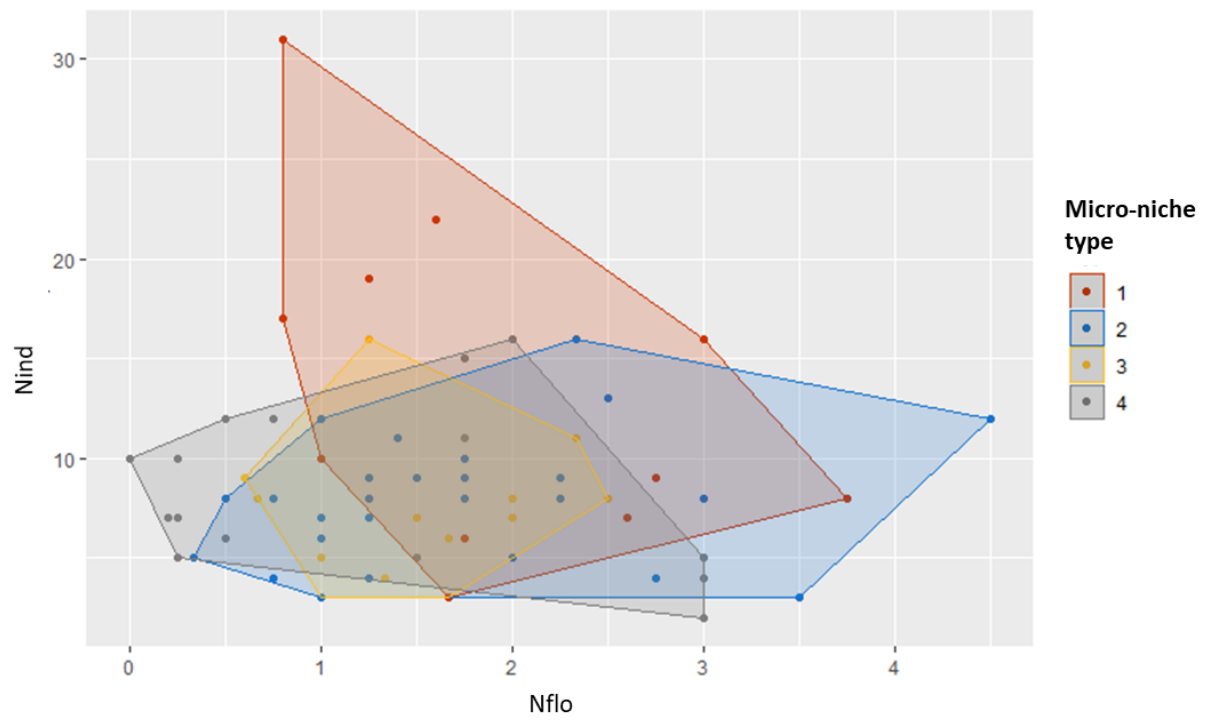

**Figure S3.** Local abundance and mean number of flowers for each quadrat depending on its micro-niche type. Local abundance corresponds to the number of plants in the quadrat (Nind), and mean number of flowers are calculated from measurements of four individuals randomly selected in each quadrat.

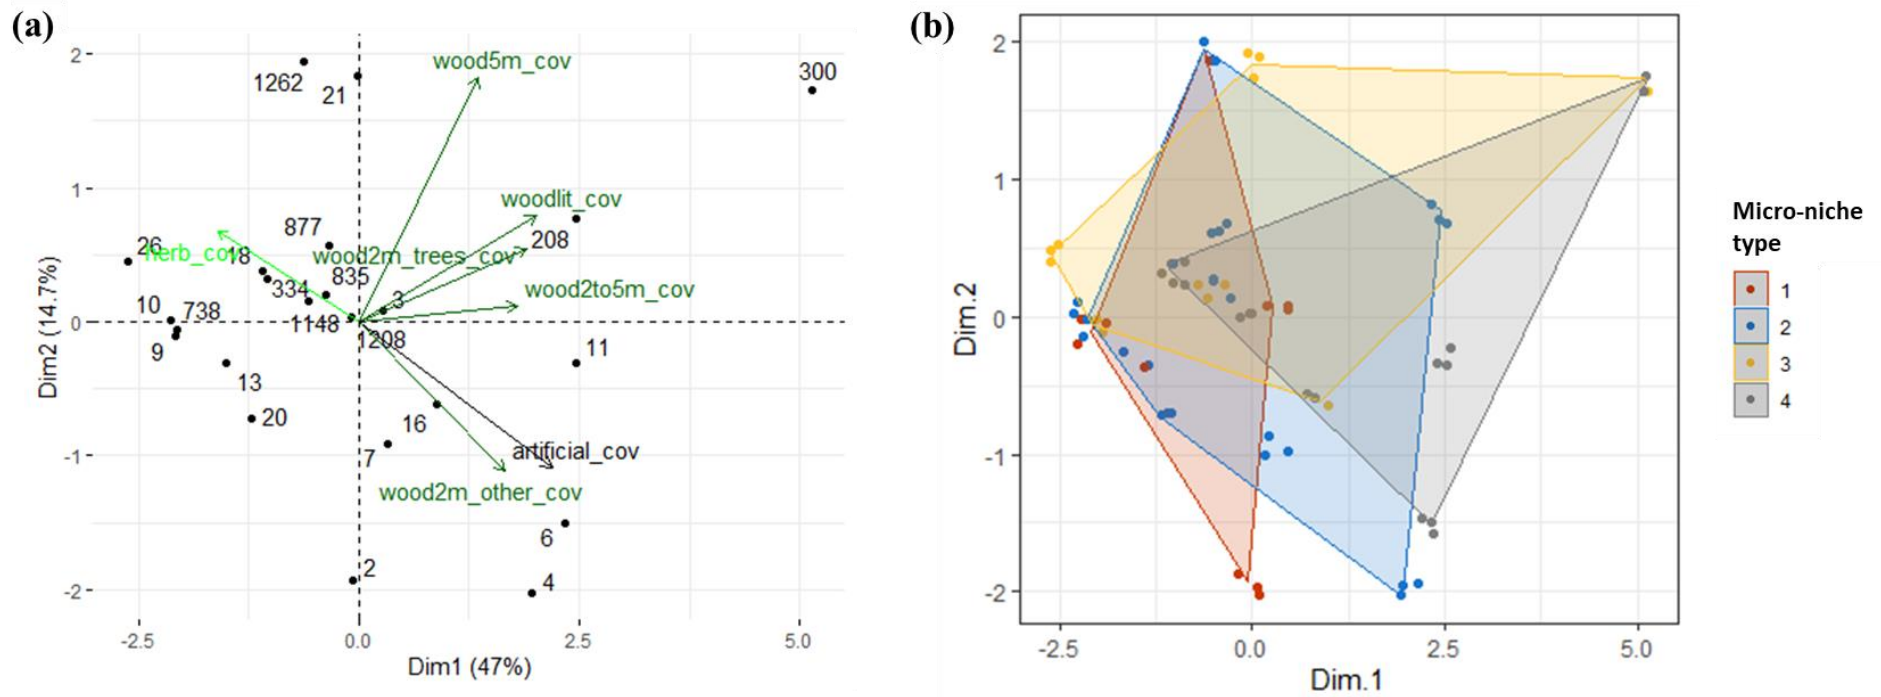

**Figure S4.** Vegetation structure and artificialization level for sampled locations of *L. pomponium*, evaluated at the site scale (40 data points per site). (a) The biplot of variables and sites from a PCA analysis, variables being coloured by type: woody elements in dark green, herbaceous cover in light green, artificial cover in dark. (b) Representation of the same plan as (a), but sites are divided in their corresponding three quadrats through jittering in order to visualize the repartition of micro-niche types without overplotting.
